# Supplementary material for: Mitochondrial respiration reduces exposure of the nucleus to oxygen
Source: PubMed Central journal article supplement — J Biol Chem. 2023 Feb 14;299(3):103018. doi: 10.1016/j.jbc.2023.103018 (PMC10011062; doi:10.1016/j.jbc.2023.103018), 2023-02-14
Supplement: mmc1.pdf [file mmc1.pdf]

# Figure S1

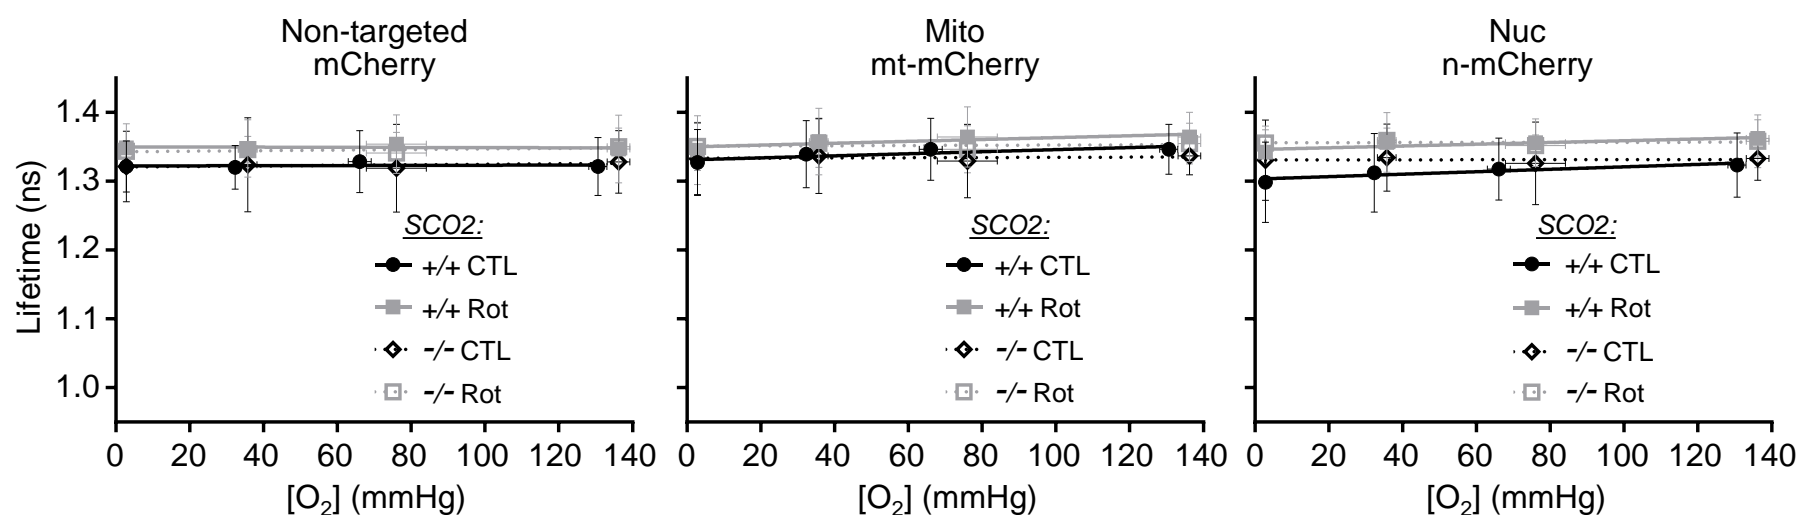

**Figure S1. The effects of refractive index on the lifetime values of mCherry in the cytosolic, mitochondrial, and nuclear compartment.** *SCO2*<sup>+/+</sup> and *SCO2*<sup>-/-</sup> cells were transfected with mCherry (without MB) that was non-targeted (“cytosol”) or targeted to the mitochondria (Mito, TFAM MTS fused mt-mCherry) or to the nucleus (Nuc, SV40 NLS fused n-mCherry) to serve as corrections for the refractive index. The cells were treated with diluent DMSO as control (CTL) or rotenone (Rot, 1  $\mu$ M), and FLIM analysis performed. The imposed [O<sub>2</sub>] (in mmHg) in the medium was measured at O<sub>2</sub> levels of 0.5, 5, 10, and 18.6% (corresponding to a range of ~2.8 to 130 mmHg) using an OxyLite Pro 1 probe. mCherry has a mean lifetime value of ~1.32 ns in non-respiring *SCO2*<sup>-/-</sup> cells and this number increased by a maximum of 3% only in rotenone treated respiring *SCO2*<sup>+/+</sup> cells, possibly due to the effects of the refractive index or pH changes. The effects of the refractive index on the lifetime data was calculated from the lifetime values measured for *SCO2*<sup>+/+</sup> CTL and *SCO2*<sup>+/+</sup> Rot. Values are mean  $\pm$  SD.

# Figure S2

**A**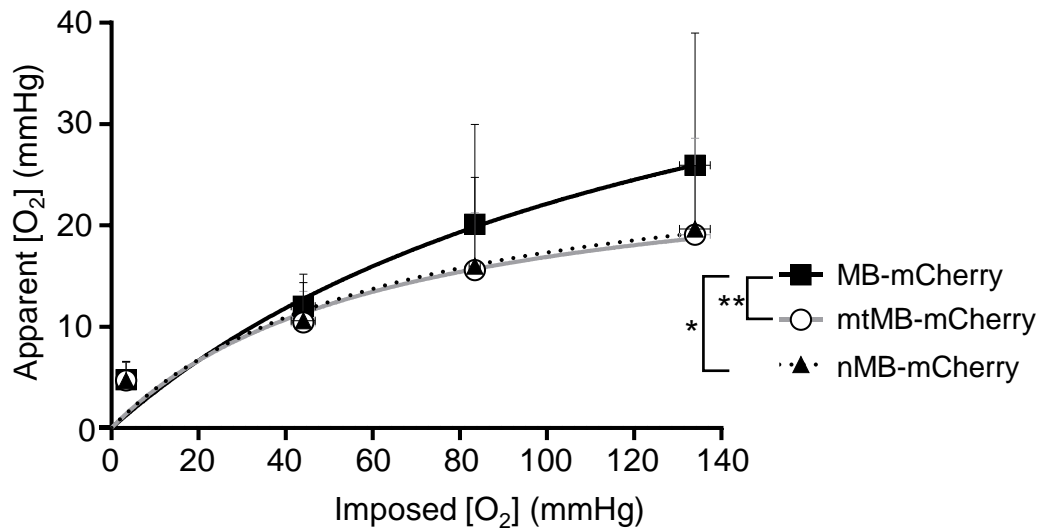**B**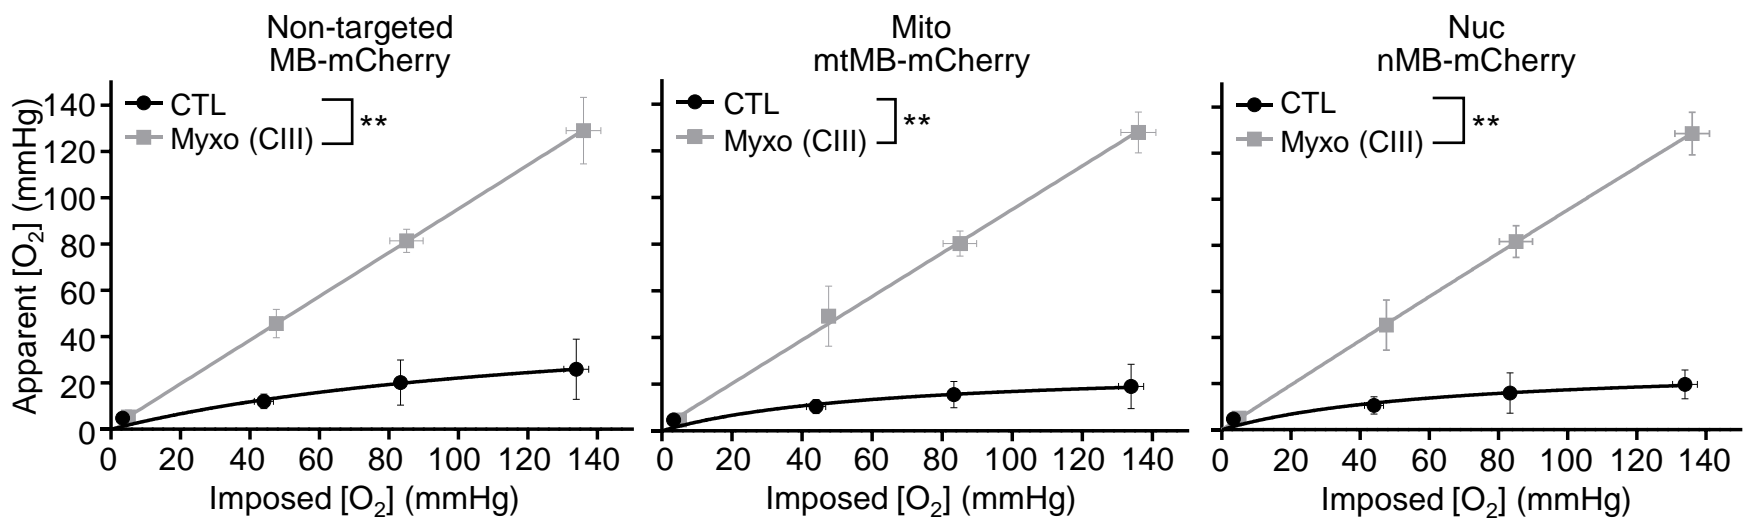

**Figure S2. Subcellular measurement of [O<sub>2</sub>] in HEK293T cells and the effect of mitochondrial respiration.** HEK293T cells were transfected with non-targeted MB-mCherry, mitochondrial mtMB-mCherry (Mito), and nuclear nMB-mCherry (Nuc). A, FLIM measurements were made under different imposed O<sub>2</sub> levels ranging from 0.5% (~2.8 mmHg) to 18.6% (~130 mmHg) and used to estimate apparent compartmental [O<sub>2</sub>]. B, Apparent [O<sub>2</sub>] measurements of untreated control (CTL) cells or those treated with inhibitor of mitochondrial respiratory complex III (CIII) myxothiazol (Myxo). Except at the lowest imposed [O<sub>2</sub>] (~2.8 mmHg), there was a statistically significant difference between the apparent [O<sub>2</sub>] values of the indicated probes or treatment conditions. Statistical difference by 2-way ANOVA with Tukey's post-test. Values are mean ± SD. \**P* < 0.05; \*\**P* < 0.01.
